# Supplementary material for: Chinese patent medicines combined with hormone replacement therapy for premature ovarian failure: A Bayesian network meta-analysis
Source: Frontiers journal article supplement (doi:10.3389/fmed.2022.1043390), 2022-11-17
Supplement: Table_1.pdf [file Table_1.pdf]

Quality of Evidence for Outcomes

YR + HRT vs HRT for POF

Patient or population: patients with POF

Settings:

Intervention: YR+HRT vs HRT

| Outcomes                     | Illustrative comparative risks* (95% CI) |                                                                                          | Relative effect<br>(95% CI) | No of Participants<br>(studies) | Quality of the evidence<br>(GRADE) | Comments |
|------------------------------|------------------------------------------|------------------------------------------------------------------------------------------|-----------------------------|---------------------------------|------------------------------------|----------|
|                              | Assumed risk                             | Corresponding risk                                                                       |                             |                                 |                                    |          |
|                              | Control                                  | YR + HRT vs HRT                                                                          |                             |                                 |                                    |          |
| Total clinical response rate | Study population                         |                                                                                          | OR 1.99<br>(1.28 to 3.1)    | 325<br>(3 studies)              | ⊕⊕⊖⊖<br><b>low</b> <sup>1,2</sup>  |          |
|                              | 373 per 1000                             | 542 per 1000<br>(432 to 648)                                                             |                             |                                 |                                    |          |
|                              | Medium risk population                   |                                                                                          |                             |                                 |                                    |          |
|                              | 400 per 1000                             | 570 per 1000<br>(460 to 674)                                                             |                             |                                 |                                    |          |
| FSH                          |                                          | The mean FSH in the intervention groups was<br><b>3.28 lower</b><br>(4.42 to 2.14 lower) |                             | 447<br>(5 studies)              | ⊕⊕⊖⊖<br><b>low</b> <sup>1,3</sup>  |          |
| LH                           |                                          | The mean LH in the intervention groups was<br><b>1.62 lower</b><br>(2.71 to 0.53 lower)  |                             | 447<br>(5 studies)              | ⊕⊕⊖⊖<br><b>low</b> <sup>1,3</sup>  |          |
| E2                           |                                          | The mean E2 in the intervention groups was<br><b>33.33 higher</b>                        |                             | 447<br>(5 studies)              | ⊕⊕⊖⊖<br><b>low</b> <sup>1,3</sup>  |          |

|                   |                         |                           |                 |           |                           |
|-------------------|-------------------------|---------------------------|-----------------|-----------|---------------------------|
|                   | (31.71 to 34.94 higher) |                           |                 |           |                           |
| Adverse reactions | Study population        |                           | OR 2.05         | 80        | ⊕⊖⊖⊖                      |
|                   | 25 per 1000             | 50 per 1000<br>(5 to 377) | (0.18 to 23.59) | (1 study) | very low <sup>1,2,4</sup> |
|                   | Medium risk population  |                           |                 |           |                           |
|                   | 25 per 1000             | 50 per 1000<br>(5 to 377) |                 |           |                           |

\*The basis for the **assumed risk** (e.g. the median control group risk across studies) is provided in footnotes. The **corresponding risk** (and its 95% confidence interval) is based on the assumed risk in the comparison group and the **relative effect** of the intervention (and its 95% CI).

CI: Confidence interval; OR: Odds ratio;

GRADE Working Group grades of evidence

**High quality:** Further research is very unlikely to change our confidence in the estimate of effect.

**Moderate quality:** Further research is likely to have an important impact on our confidence in the estimate of effect and may change the estimate.

**Low quality:** Further research is very likely to have an important impact on our confidence in the estimate of effect and is likely to change the estimate.

**Very low quality:** We are very uncertain about the estimate.

<sup>1</sup> The blinding and distribution concealment methods was no mention in the literature, and there were methodological flaws.

<sup>2</sup> The number of cases included in the literature was low.

<sup>3</sup> The funnel chart indicated publication bias.

<sup>4</sup> Only one document was included.

LWDH + HRT vs HRT for POF

**Patient or population:** patients with POF

**Settings:**

**Intervention:** LWDH + HRT

| Outcomes                     | Illustrative comparative risks* (95% CI)                                                     |                              | Relative effect<br>(95% CI) | No of Participants<br>(studies) | Quality of the evidence<br>(GRADE) | Comments |
|------------------------------|----------------------------------------------------------------------------------------------|------------------------------|-----------------------------|---------------------------------|------------------------------------|----------|
|                              | Assumed risk                                                                                 | Corresponding risk           |                             |                                 |                                    |          |
|                              | Control                                                                                      | LWDH + HRT vs HRT            |                             |                                 |                                    |          |
| Total clinical response rate | Study population                                                                             |                              | OR 1.56                     | 409                             | ⊕⊕⊖⊖                               |          |
|                              | 325 per 1000                                                                                 | 429 per 1000<br>(334 to 531) | (1.04 to 2.35)              | (5 studies)                     | low <sup>1,2</sup>                 |          |
|                              | Medium risk population                                                                       |                              |                             |                                 |                                    |          |
|                              | 350 per 1000                                                                                 | 457 per 1000<br>(359 to 559) |                             |                                 |                                    |          |
| FSH                          | The mean FSH in the intervention groups was<br><b>5.29 lower</b><br>(7.34 to 3.23 lower)     |                              |                             | 481<br>(7 studies)              | ⊕⊕⊖⊖<br>low <sup>1,2</sup>         |          |
| LH                           | The mean LH in the intervention groups was<br><b>3.75 lower</b><br>(4.96 to 2.54 lower)      |                              |                             | 590<br>(7 studies)              | ⊕⊕⊖⊖<br>low <sup>1,2</sup>         |          |
| E2                           | The mean E2 in the intervention groups was<br><b>14.12 higher</b><br>(12.18 to 16.07 higher) |                              |                             | 590<br>(7 studies)              | ⊕⊕⊖⊖<br>low <sup>1,2</sup>         |          |

\*The basis for the **assumed risk** (e.g. the median control group risk across studies) is provided in footnotes. The **corresponding risk** (and its 95% confidence interval) is based on the assumed risk in the comparison group and the **relative effect** of the intervention (and its 95% CI).

CI: Confidence interval; OR: Odds ratio;

GRADE Working Group grades of evidence

**High quality:** Further research is very unlikely to change our confidence in the estimate of effect.

**Moderate quality:** Further research is likely to have an important impact on our confidence in the estimate of effect and may change the estimate.

**Low quality:** Further research is very likely to have an important impact on our confidence in the estimate of effect and is likely to change the estimate.

**Very low quality:** We are very uncertain about the estimate.

<sup>1</sup> The blinding and distribution concealment methods was no metion in the literature, and there were methodological flaws.

<sup>2</sup> The funnel chart indicated publication bias.

XFZY + HRT vs HRT for POF

**Patient or population:** patients with HRT

**Settings:**

**Intervention:** XFZY + HRT

| Outcomes                     | Illustrative comparative risks* (95% CI) |                              | Relative effect<br>(95% CI) | No of Participants<br>(studies) | Quality of the evidence<br>(GRADE) | Comments |
|------------------------------|------------------------------------------|------------------------------|-----------------------------|---------------------------------|------------------------------------|----------|
|                              | Assumed risk                             | Corresponding risk           |                             |                                 |                                    |          |
|                              | Control                                  | XFZY + HRT vs HRT            |                             |                                 |                                    |          |
| Total clinical response rate | Study population                         |                              | OR 2.17<br>(1.15 to 4.1)    | 158<br>(3 studies)              | ⊕⊖⊖⊖<br>very low <sup>1,2,3</sup>  |          |
|                              | 342 per 1000                             | 530 per 1000<br>(374 to 681) |                             |                                 |                                    |          |
|                              | Medium risk population                   |                              |                             |                                 |                                    |          |

|                          |                               |                                                                                           |                   |                                          |
|--------------------------|-------------------------------|-------------------------------------------------------------------------------------------|-------------------|------------------------------------------|
|                          | <b>324 per 1000</b>           | <b>510 per 1000</b><br>(355 to 663)                                                       |                   |                                          |
| <b>FSH</b>               |                               | The mean FSH in the intervention groups was<br><b>9.3 lower</b><br>(16.24 to 2.36 lower)  | 98<br>(2 studies) | ⊕⊖⊖⊖<br><b>very low</b> <sup>1,2,3</sup> |
| <b>LH</b>                |                               | The mean LH in the intervention groups was<br><b>3.07 higher</b><br>(1.95 to 4.19 higher) | 98<br>(2 studies) | ⊕⊖⊖⊖<br><b>very low</b> <sup>1,2,3</sup> |
| <b>E2</b>                |                               | The mean E2 in the intervention groups was<br><b>3.8 higher</b><br>(1.04 to 6.56 higher)  | 98<br>(2 studies) | ⊕⊖⊖⊖<br><b>very low</b> <sup>1,2,3</sup> |
| <b>Adverse reactions</b> | <b>Study population</b>       |                                                                                           | <b>OR 1</b>       | ⊕⊖⊖⊖                                     |
|                          | <b>67 per 1000</b>            | <b>67 per 1000</b><br>(9 to 353)                                                          | (0.13 to 7.6)     | <b>very low</b> <sup>1,2,3</sup>         |
|                          | <b>Medium risk population</b> |                                                                                           |                   |                                          |
|                          | <b>67 per 1000</b>            | <b>67 per 1000</b><br>(9 to 353)                                                          |                   |                                          |

\*The basis for the **assumed risk** (e.g. the median control group risk across studies) is provided in footnotes. The **corresponding risk** (and its 95% confidence interval) is based on the assumed risk in the comparison group and the **relative effect** of the intervention (and its 95% CI).

**CI:** Confidence interval; **OR:** Odds ratio;

GRADE Working Group grades of evidence

**High quality:** Further research is very unlikely to change our confidence in the estimate of effect.

**Moderate quality:** Further research is likely to have an important impact on our confidence in the estimate of effect and may change the estimate.

**Low quality:** Further research is very likely to have an important impact on our confidence in the estimate of effect and is likely to change the estimate.

**Very low quality:** We are very uncertain about the estimate.

<sup>1</sup> The blinding and distribution concealment methods was no metion in the literature, and there were methodological flaws.

<sup>2</sup> The number of cases included in the literature was low.

<sup>3</sup> The funnel chart indicated publication bias.

**PK + HRT vs HRT for POF**

**Patient or population:** patients with POF

**Settings:**

**Intervention:** PK + HRT

| Outcomes                     | Illustrative comparative risks* (95% CI)                  |                             | Relative effect<br>(95% CI) | No of Participants<br>(studies) | Quality of the evidence<br>(GRADE)       | Comments |
|------------------------------|-----------------------------------------------------------|-----------------------------|-----------------------------|---------------------------------|------------------------------------------|----------|
|                              | Assumed risk                                              | Corresponding risk          |                             |                                 |                                          |          |
|                              | Control                                                   | PK + HRT vs HRT             |                             |                                 |                                          |          |
| Total clinical response rate | Study population                                          |                             | OR 2.62<br>(0.72 to 9.61)   | 65<br>(1 study)                 | ⊕⊖⊖⊖<br><b>very low</b> <sup>1,2,3</sup> |          |
|                              | 125 per 1000                                              | 272 per 1000<br>(93 to 579) |                             |                                 |                                          |          |
|                              | Medium risk population                                    |                             |                             |                                 |                                          |          |
|                              | 125 per 1000                                              | 272 per 1000<br>(93 to 579) |                             |                                 |                                          |          |
| FSH                          | The mean FSH in the intervention groups was<br>4.99 lower |                             |                             | 89<br>(2 studies)               | ⊕⊖⊖⊖<br><b>very low</b> <sup>1,2,4</sup> |          |

|           |                                                                                          |                   |                                          |
|-----------|------------------------------------------------------------------------------------------|-------------------|------------------------------------------|
|           | (7.9 to 2.07 lower)                                                                      |                   |                                          |
| <b>E2</b> | The mean E2 in the intervention groups was<br><b>4.8 higher</b><br>(2.92 to 6.68 higher) | 89<br>(2 studies) | ⊕⊖⊖⊖<br><b>very low</b> <sup>1,2,4</sup> |

\*The basis for the **assumed risk** (e.g. the median control group risk across studies) is provided in footnotes. The **corresponding risk** (and its 95% confidence interval) is based on the assumed risk in the comparison group and the **relative effect** of the intervention (and its 95% CI).

**CI:** Confidence interval; **OR:** Odds ratio;

GRADE Working Group grades of evidence

**High quality:** Further research is very unlikely to change our confidence in the estimate of effect.

**Moderate quality:** Further research is likely to have an important impact on our confidence in the estimate of effect and may change the estimate.

**Low quality:** Further research is very likely to have an important impact on our confidence in the estimate of effect and is likely to change the estimate.

**Very low quality:** We are very uncertain about the estimate.

<sup>1</sup> The blinding and distribution concealment methods was no mention in the literature, and there were methodological flaws.

<sup>2</sup> The number of cases included in the literature was low.

<sup>3</sup> Only one document was included.

<sup>4</sup> The funnel chart indicated publication bias.

## HCDZ + HRT vs HRT for POF

**Patient or population:** patients with POF

**Settings:**

**Intervention:** HCDZ + HRT

| Outcomes                     | Illustrative comparative risks* (95% CI) |                                                                                            | Relative effect<br>(95% CI) | No of Participants<br>(studies) | Quality of the evidence<br>(GRADE)       | Comments |
|------------------------------|------------------------------------------|--------------------------------------------------------------------------------------------|-----------------------------|---------------------------------|------------------------------------------|----------|
|                              | Assumed risk                             | Corresponding risk                                                                         |                             |                                 |                                          |          |
|                              | Control                                  | HCDZ + HRT vs HRT                                                                          |                             |                                 |                                          |          |
| Total clinical response rate | Study population                         |                                                                                            | OR 2.91<br>(1.44 to 5.86)   | 135<br>(2 studies)              | ⊕⊕⊖⊖<br><b>low</b> <sup>1,2</sup>        |          |
|                              | 358 per 1000                             | 619 per 1000<br>(445 to 766)                                                               |                             |                                 |                                          |          |
|                              | Medium risk population                   |                                                                                            |                             |                                 |                                          |          |
|                              | 356 per 1000                             | 617 per 1000<br>(443 to 764)                                                               |                             |                                 |                                          |          |
| FSH                          |                                          | The mean FSH in the intervention groups was<br><b>4.24 lower</b><br>(6.15 to 2.33 lower)   |                             | 135<br>(2 studies)              | ⊕⊖⊖⊖<br><b>very low</b> <sup>1,2,3</sup> |          |
| LH                           |                                          | The mean LH in the intervention groups was<br><b>2.83 lower</b><br>(4.33 to 1.34 lower)    |                             | 135<br>(2 studies)              | ⊕⊖⊖⊖<br><b>very low</b> <sup>1,2,3</sup> |          |
| E2                           |                                          | The mean E2 in the intervention groups was<br><b>6.95 higher</b><br>(3.74 to 10.16 higher) |                             | 135<br>(2 studies)              | ⊕⊖⊖⊖<br><b>very low</b> <sup>1,2,3</sup> |          |
| Adverse reactions            | See comment                              | See comment                                                                                | Not estimable               | 135<br>(2 studies)              | ⊕⊕⊖⊖<br><b>low</b> <sup>1,3</sup>        |          |

\*The basis for the **assumed risk** (e.g. the median control group risk across studies) is provided in footnotes. The **corresponding risk** (and its 95% confidence interval) is based on the assumed risk in the comparison group and the **relative effect** of the intervention (and its 95% CI).

CI: Confidence interval; OR: Odds ratio;



GRADE Working Group grades of evidence

**High quality:** Further research is very unlikely to change our confidence in the estimate of effect.

**Moderate quality:** Further research is likely to have an important impact on our confidence in the estimate of effect and may change the estimate.

**Low quality:** Further research is very likely to have an important impact on our confidence in the estimate of effect and is likely to change the estimate.

**Very low quality:** We are very uncertain about the estimate.

<sup>1</sup> The blinding and distribution concealment methods was no metion in the literature, and there were methodological flaws.

<sup>2</sup> The funnel chart indicated publication bias.

<sup>3</sup> The number of cases included in the literature was low.

**ZHC + HRT vs HRT for POF**

**Patient or population:** patients with POF

**Settings:**

**Intervention:** ZHC + HRT

| Outcomes                     | Illustrative comparative risks* (95% CI) |                              | Relative effect<br>(95% CI) | No of Participants<br>(studies) | Quality of the evidence<br>(GRADE)       | Comments |
|------------------------------|------------------------------------------|------------------------------|-----------------------------|---------------------------------|------------------------------------------|----------|
|                              | Assumed risk                             | Corresponding risk           |                             |                                 |                                          |          |
|                              | Control                                  | ZHC + HRT vs HRT             |                             |                                 |                                          |          |
| Total clinical response rate | Study population                         |                              | OR 2.2<br>(0.96 to 5.05)    | 135<br>(2 studies)              | ⊕⊖⊖⊖<br><b>very low</b> <sup>1,2,3</sup> |          |
|                              | 162 per 1000                             | 298 per 1000<br>(157 to 494) |                             |                                 |                                          |          |
|                              | Medium risk population                   |                              |                             |                                 |                                          |          |
|                              | 162 per 1000                             | 298 per 1000<br>(157 to 494) |                             |                                 |                                          |          |

|                   |                                                                                              |                            |                           |                                          |                                          |
|-------------------|----------------------------------------------------------------------------------------------|----------------------------|---------------------------|------------------------------------------|------------------------------------------|
| FSH               | The mean FSH in the intervention groups was<br><b>5.07 lower</b><br>(8.11 to 2.03 lower)     |                            | 65<br>(1 study)           | ⊕⊖⊖⊖<br><b>very low</b> <sup>1,2,4</sup> |                                          |
| E2                | The mean E2 in the intervention groups was<br><b>41.79 higher</b><br>(26.73 to 56.85 higher) |                            | 65<br>(1 study)           | ⊕⊖⊖⊖<br><b>very low</b> <sup>1,2,4</sup> |                                          |
| Adverse reactions | Study population                                                                             |                            | OR 0.48<br>(0.08 to 2.84) | 65<br>(1 study)                          | ⊕⊖⊖⊖<br><b>very low</b> <sup>1,2,4</sup> |
|                   | 121 per 1000                                                                                 | 62 per 1000<br>(11 to 281) |                           |                                          |                                          |
|                   | Medium risk population                                                                       |                            |                           |                                          |                                          |
|                   | 121 per 1000                                                                                 | 62 per 1000<br>(11 to 281) |                           |                                          |                                          |

\*The basis for the **assumed risk** (e.g. the median control group risk across studies) is provided in footnotes. The **corresponding risk** (and its 95% confidence interval) is based on the assumed risk in the comparison group and the **relative effect** of the intervention (and its 95% CI).

**CI:** Confidence interval; **OR:** Odds ratio;

GRADE Working Group grades of evidence

**High quality:** Further research is very unlikely to change our confidence in the estimate of effect.

**Moderate quality:** Further research is likely to have an important impact on our confidence in the estimate of effect and may change the estimate.

**Low quality:** Further research is very likely to have an important impact on our confidence in the estimate of effect and is likely to change the estimate.

**Very low quality:** We are very uncertain about the estimate.

<sup>1</sup> The blinding and distribution concealment methods was no mention in the literature, and there were methodological flaws.

<sup>2</sup> The number of cases included in the literature was low.

<sup>3</sup> The funnel chart indicated publication bias.

<sup>4</sup> Only one document was included.

SW + HRT vs HRT for POF

Patient or population: patients with POF

Settings:

Intervention: SW + HRT

| Outcomes                     | Illustrative comparative risks* (95% CI)                                               |                              | Relative effect<br>(95% CI) | No of Participants<br>(studies) | Quality of the evidence<br>(GRADE)       | Comments |
|------------------------------|----------------------------------------------------------------------------------------|------------------------------|-----------------------------|---------------------------------|------------------------------------------|----------|
|                              | Assumed risk                                                                           | Corresponding risk           |                             |                                 |                                          |          |
|                              | Control                                                                                | SW + HRT vs HRT              |                             |                                 |                                          |          |
| Total clinical response rate | Study population                                                                       |                              | OR 2.86<br>(1.33 to 6.16)   | 164<br>(1 study)                | ⊕⊕⊖⊖<br><b>low</b> <sup>1,2</sup>        |          |
|                              | 671 per 1000                                                                           | 854 per 1000<br>(731 to 926) |                             |                                 |                                          |          |
|                              | Medium risk population                                                                 |                              |                             |                                 |                                          |          |
|                              | 671 per 1000                                                                           | 854 per 1000<br>(731 to 926) |                             |                                 |                                          |          |
| FSH                          | The mean FSH in the intervention groups was<br><b>3.1 lower</b><br>(4.5 to 1.7 lower)  |                              |                             | 164<br>(1 study)                | ⊕⊖⊖⊖<br><b>very low</b> <sup>1,2,3</sup> |          |
| LH                           | The mean LH in the intervention groups was<br><b>5.2 lower</b><br>(8.21 to 2.19 lower) |                              |                             | 164<br>(1 study)                | ⊕⊖⊖⊖<br><b>very low</b> <sup>1,2,3</sup> |          |

|           |                                                                                          |                  |                                          |
|-----------|------------------------------------------------------------------------------------------|------------------|------------------------------------------|
| <b>E2</b> | The mean E2 in the intervention groups was<br><b>5.5 higher</b><br>(4.01 to 6.99 higher) | 164<br>(1 study) | ⊕⊖⊖⊖<br><b>very low</b> <sup>1,2,3</sup> |
|-----------|------------------------------------------------------------------------------------------|------------------|------------------------------------------|

\*The basis for the **assumed risk** (e.g. the median control group risk across studies) is provided in footnotes. The **corresponding risk** (and its 95% confidence interval) is based on the assumed risk in the comparison group and the **relative effect** of the intervention (and its 95% CI).

**CI:** Confidence interval; **OR:** Odds ratio;

GRADE Working Group grades of evidence

**High quality:** Further research is very unlikely to change our confidence in the estimate of effect.

**Moderate quality:** Further research is likely to have an important impact on our confidence in the estimate of effect and may change the estimate.

**Low quality:** Further research is very likely to have an important impact on our confidence in the estimate of effect and is likely to change the estimate.

**Very low quality:** We are very uncertain about the estimate.

<sup>1</sup> The blinding and distribution concealment methods was no metion in the literature, and there was methodological flaw.

<sup>2</sup> Only one document was included.

<sup>3</sup> The number of cases included in the literature was low.

**ZG + HRT vs HRT for POF**

**Patient or population:** patiens with POF

**Settings:**

**Intervention:** ZG + HRT

| Outcomes | Illustrative comparative risks* (95% CI) |                        | Relative effect<br>(95% CI) | No of Participants<br>(studies) | Quality of the evidence<br>(GRADE) | Comments |
|----------|------------------------------------------|------------------------|-----------------------------|---------------------------------|------------------------------------|----------|
|          | Assumed risk                             | Corresponding risk     |                             |                                 |                                    |          |
|          | <b>Control</b>                           | <b>ZG + HRT vs HRT</b> |                             |                                 |                                    |          |

|                             |                                                                                              |                             |                            |                 |                                          |
|-----------------------------|----------------------------------------------------------------------------------------------|-----------------------------|----------------------------|-----------------|------------------------------------------|
| Total clinical response rat | Study population                                                                             |                             | OR 3.45<br>(0.79 to 15.01) | 50<br>(1 study) | ⊕⊖⊖⊖<br><b>very low</b> <sup>1,2,3</sup> |
|                             | 120 per 1000                                                                                 | 320 per 1000<br>(97 to 672) |                            |                 |                                          |
|                             | Medium risk population                                                                       |                             |                            |                 |                                          |
|                             | 120 per 1000                                                                                 | 320 per 1000<br>(97 to 672) |                            |                 |                                          |
| FSH                         | The mean FSH in the intervention groups was<br><b>8.81 lower</b><br>(11.1 to 6.52 lower)     |                             |                            | 50<br>(1 study) | ⊕⊖⊖⊖<br><b>very low</b> <sup>1,2,3</sup> |
| LH                          | The mean LH in the intervention groups was<br><b>5.15 lower</b><br>(7.38 to 2.92 lower)      |                             |                            | 50<br>(1 study) | ⊕⊖⊖⊖<br><b>very low</b> <sup>1,2,3</sup> |
| E2                          | The mean E2 in the intervention groups was<br><b>28.47 higher</b><br>(24.02 to 32.92 higher) |                             |                            | 50<br>(1 study) | ⊕⊖⊖⊖<br><b>very low</b> <sup>1,2,3</sup> |

\*The basis for the **assumed risk** (e.g. the median control group risk across studies) is provided in footnotes. The **corresponding risk** (and its 95% confidence interval) is based on the assumed risk in the comparison group and the **relative effect** of the intervention (and its 95% CI).

CI: Confidence interval; OR: Odds ratio;

GRADE Working Group grades of evidence

**High quality:** Further research is very unlikely to change our confidence in the estimate of effect.

**Moderate quality:** Further research is likely to have an important impact on our confidence in the estimate of effect and may change the estimate.

**Low quality:** Further research is very likely to have an important impact on our confidence in the estimate of effect and is likely to change the estimate.

**Very low quality:** We are very uncertain about the estimate.

<sup>1</sup> The blinding and distribution concealment methods was no metion in the literature, and there were methodological flaws.

<sup>2</sup> The number of cases included in the literature was low.

<sup>3</sup> Only one document was included.

## GS + HRT vs HRT for POF

**Patient or population:** patients with POF

**Settings:**

**Intervention:** GS + HRT

| Outcomes                     | Illustrative comparative risks* (95% CI)                                                 |                              | Relative effect<br>(95% CI) | No of Participants<br>(studies) | Quality of the evidence<br>(GRADE)       | Comments |
|------------------------------|------------------------------------------------------------------------------------------|------------------------------|-----------------------------|---------------------------------|------------------------------------------|----------|
|                              | Assumed risk                                                                             | Corresponding risk           |                             |                                 |                                          |          |
|                              | Control                                                                                  | GS + HRT vs HRT              |                             |                                 |                                          |          |
| Total clinical response rate | Study population                                                                         |                              | OR 3.16<br>(1.25 to 7.96)   | 82<br>(1 study)                 | ⊕⊖⊖⊖<br><b>very low</b> <sup>1,2,3</sup> |          |
|                              | 268 per 1000                                                                             | 536 per 1000<br>(314 to 745) |                             |                                 |                                          |          |
|                              | Medium risk population                                                                   |                              |                             |                                 |                                          |          |
|                              | 268 per 1000                                                                             | 536 per 1000<br>(314 to 745) |                             |                                 |                                          |          |
| FSH                          | The mean FSH in the intervention groups was<br><b>7.59 lower</b><br>(8.94 to 6.24 lower) |                              |                             | 82<br>(1 study)                 | ⊕⊖⊖⊖<br><b>very low</b> <sup>1,2,3</sup> |          |
| LH                           | The mean LH in the intervention groups was<br><b>5.54 lower</b>                          |                              |                             | 82<br>(1 study)                 | ⊕⊖⊖⊖<br><b>very low</b> <sup>1,2,3</sup> |          |

|           |                                                                                          |                 |                                          |
|-----------|------------------------------------------------------------------------------------------|-----------------|------------------------------------------|
|           | (6.32 to 4.76 lower)                                                                     |                 |                                          |
| <b>E2</b> | The mean E2 in the intervention groups was<br><b>6.2 higher</b><br>(4.82 to 7.58 higher) | 82<br>(1 study) | ⊕⊖⊖⊖<br><b>very low</b> <sup>1,2,3</sup> |

\*The basis for the **assumed risk** (e.g. the median control group risk across studies) is provided in footnotes. The **corresponding risk** (and its 95% confidence interval) is based on the assumed risk in the comparison group and the **relative effect** of the intervention (and its 95% CI).

**CI:** Confidence interval; **OR:** Odds ratio;

GRADE Working Group grades of evidence

**High quality:** Further research is very unlikely to change our confidence in the estimate of effect.

**Moderate quality:** Further research is likely to have an important impact on our confidence in the estimate of effect and may change the estimate.

**Low quality:** Further research is very likely to have an important impact on our confidence in the estimate of effect and is likely to change the estimate.

**Very low quality:** We are very uncertain about the estimate.

<sup>1</sup> The blinding and distribution concealment methods was no metion in the literature, and there were methodological flaws.

<sup>2</sup> The number of cases included in the literature was low.

<sup>3</sup> Only one document was included.

**ZSYT + HRT vs HRT for POF**

**Patient or population:** patients with POF

**Settings:**

**Intervention:** ZSYT + HRT

| Outcomes | Illustrative comparative risks* (95% CI) | Relative effect | No of Participants | Quality of the evidence | Comments |
|----------|------------------------------------------|-----------------|--------------------|-------------------------|----------|
|----------|------------------------------------------|-----------------|--------------------|-------------------------|----------|

|                              | Assumed risk<br>Control | Corresponding risk<br>ZSYT + HRT vs HRT                                                      | (95% CI)       | (studies)       | (GRADE)                           |
|------------------------------|-------------------------|----------------------------------------------------------------------------------------------|----------------|-----------------|-----------------------------------|
| Total clinical response rate | Study population        |                                                                                              | OR 1.8         | 78              | ⊕⊖⊖⊖                              |
|                              | 179 per 1000            | 282 per 1000<br>(117 to 534)                                                                 | (0.61 to 5.26) | (1 study)       | very low <sup>1,2,3</sup>         |
|                              | Medium risk population  |                                                                                              |                |                 |                                   |
|                              | 180 per 1000            | 283 per 1000<br>(118 to 536)                                                                 |                |                 |                                   |
| FSH                          |                         | The mean FSH in the intervention groups was<br><b>6.71 lower</b><br>(8.26 to 5.16 lower)     |                | 78<br>(1 study) | ⊕⊖⊖⊖<br>very low <sup>1,2,3</sup> |
| LH                           |                         | The mean LH in the intervention groups was<br><b>4.41 lower</b><br>(5.44 to 3.38 lower)      |                | 78<br>(1 study) | ⊕⊖⊖⊖<br>very low <sup>1,2,3</sup> |
| E2                           |                         | The mean E2 in the intervention groups was<br><b>26.39 higher</b><br>(22.31 to 30.47 higher) |                | 78<br>(1 study) | ⊕⊖⊖⊖<br>very low <sup>1,2,3</sup> |
| Adverse reactions            | Study population        |                                                                                              | OR 1.37        | 78              | ⊕⊖⊖⊖                              |
|                              | 77 per 1000             | 103 per 1000<br>(24 to 354)                                                                  | (0.29 to 6.58) | (1 study)       | very low <sup>1,2,3</sup>         |
|                              | Medium risk population  |                                                                                              |                |                 |                                   |
|                              | 77 per 1000             | 103 per 1000<br>(24 to 354)                                                                  |                |                 |                                   |



\*The basis for the **assumed risk** (e.g. the median control group risk across studies) is provided in footnotes. The **corresponding risk** (and its 95% confidence interval) is based on the assumed risk in the comparison group and the **relative effect** of the intervention (and its 95% CI).

**CI:** Confidence interval; **OR:** Odds ratio;

GRADE Working Group grades of evidence

**High quality:** Further research is very unlikely to change our confidence in the estimate of effect.

**Moderate quality:** Further research is likely to have an important impact on our confidence in the estimate of effect and may change the estimate.

**Low quality:** Further research is very likely to have an important impact on our confidence in the estimate of effect and is likely to change the estimate.

**Very low quality:** We are very uncertain about the estimate.

<sup>1</sup> The blinding and distribution concealment methods was no metion in the literature, and there were methodological flaws.

<sup>2</sup> The number of cases included in the literature was low.

<sup>3</sup> Only one document was included.

**HS + HRT vs HRT for POF**

**Patient or population:** patients with POF

**Settings:**

**Intervention:** HS + HRT

| Outcomes                     | Illustrative comparative risks* (95% CI) |                              | Relative effect<br>(95% CI) | No of Participants<br>(studies) | Quality of the evidence<br>(GRADE) | Comments |
|------------------------------|------------------------------------------|------------------------------|-----------------------------|---------------------------------|------------------------------------|----------|
|                              | Assumed risk                             | Corresponding risk           |                             |                                 |                                    |          |
|                              | Control                                  | HS + HRT vs HRT              |                             |                                 |                                    |          |
| Total clinical response rate | Study population                         |                              | OR 1.8                      | 132                             | ⊕⊕⊕⊖                               |          |
|                              | 303 per 1000                             | 439 per 1000<br>(277 to 616) | (0.88 to 3.69)              | (1 study)                       | low <sup>1,2</sup>                 |          |

|                          | Medium risk population |                                                                                            |                                   |                                          |
|--------------------------|------------------------|--------------------------------------------------------------------------------------------|-----------------------------------|------------------------------------------|
|                          | 303 per 1000           | 439 per 1000<br>(277 to 616)                                                               |                                   |                                          |
| <b>FSH</b>               |                        | The mean FSH in the intervention groups was<br><b>5.38 lower</b><br>(6.71 to 4.05 lower)   | 132<br>(1 study)                  | ⊕⊖⊖⊖<br><b>very low</b> <sup>1,2,3</sup> |
| <b>LH</b>                |                        | The mean LH in the intervention groups was<br><b>4.61 lower</b><br>(5.57 to 3.65 lower)    | 132<br>(1 study)                  | ⊕⊖⊖⊖<br><b>very low</b> <sup>1,2,3</sup> |
| <b>E2</b>                |                        | The mean E2 in the intervention groups was<br><b>19.35 higher</b><br>(13.6 to 25.1 higher) | 132<br>(1 study)                  | ⊕⊖⊖⊖<br><b>very low</b> <sup>1,2,3</sup> |
| <b>Adverse reactions</b> | See comment            | See comment                                                                                | Not estimable<br>132<br>(1 study) | ⊕⊖⊖⊖<br><b>very low</b> <sup>1,2,3</sup> |

\*The basis for the **assumed risk** (e.g. the median control group risk across studies) is provided in footnotes. The **corresponding risk** (and its 95% confidence interval) is based on the assumed risk in the comparison group and the **relative effect** of the intervention (and its 95% CI).

**CI:** Confidence interval; **OR:** Odds ratio;

GRADE Working Group grades of evidence

**High quality:** Further research is very unlikely to change our confidence in the estimate of effect.

**Moderate quality:** Further research is likely to have an important impact on our confidence in the estimate of effect and may change the estimate.

**Low quality:** Further research is very likely to have an important impact on our confidence in the estimate of effect and is likely to change the estimate.

**Very low quality:** We are very uncertain about the estimate.

<sup>1</sup> The blinding and distribution concealment methods was no metion in the literature, and there were methodological flaws.

<sup>2</sup> Only one document was included.

<sup>3</sup> The number of cases included in the literature was low.

KT + HRT vs HRT for POF

Patient or population: patients with POF

Settings:

Intervention: KT + HRT

| Outcomes                     | Illustrative comparative risks* (95% CI)                                                |                              | Relative effect<br>(95% CI) | No of Participants<br>(studies) | Quality of the evidence<br>(GRADE) | Comments |
|------------------------------|-----------------------------------------------------------------------------------------|------------------------------|-----------------------------|---------------------------------|------------------------------------|----------|
|                              | Assumed risk                                                                            | Corresponding risk           |                             |                                 |                                    |          |
|                              | Control                                                                                 | KT + HRT vs HRT              |                             |                                 |                                    |          |
| Total clinical response rate | Study population                                                                        |                              | OR 2.3<br>(1.96 to 2.69)    | 2831<br>(30 studies)            | ⊕⊕⊖⊖<br><b>low</b> <sup>1,2</sup>  |          |
|                              | 468 per 1000                                                                            | 669 per 1000<br>(633 to 703) |                             |                                 |                                    |          |
|                              | Medium risk population                                                                  |                              |                             |                                 |                                    |          |
|                              | 414 per 1000                                                                            | 619 per 1000<br>(581 to 655) |                             |                                 |                                    |          |
| FSH                          | The mean FSH in the intervention groups was<br><b>2.37 lower</b><br>(2.5 to 2.24 lower) |                              |                             | 3407<br>(34 studies)            | ⊕⊕⊖⊖<br><b>low</b> <sup>1,2</sup>  |          |
| LH                           | The mean LH in the intervention groups was<br><b>3.84 lower</b><br>(4.03 to 3.65 lower) |                              |                             | 2775<br>(29 studies)            | ⊕⊕⊖⊖<br><b>low</b> <sup>1,2</sup>  |          |

|                   |                                                                                           |                            |                          |                                   |                                   |
|-------------------|-------------------------------------------------------------------------------------------|----------------------------|--------------------------|-----------------------------------|-----------------------------------|
| E2                | The mean E2 in the intervention groups was<br><b>1.26 higher</b><br>(1.09 to 1.42 higher) |                            | 3307<br>(33 studies)     | ⊕⊕⊖⊖<br><b>low</b> <sup>1,2</sup> |                                   |
| Adverse reactions | Study population                                                                          |                            | OR 0.46<br>(0.3 to 0.72) | 886<br>(9 studies)                | ⊕⊕⊖⊖<br><b>low</b> <sup>1,2</sup> |
|                   | 152 per 1000                                                                              | 76 per 1000<br>(51 to 114) |                          |                                   |                                   |
|                   | Medium risk population                                                                    |                            |                          |                                   |                                   |
|                   | 189 per 1000                                                                              | 97 per 1000<br>(65 to 144) |                          |                                   |                                   |

\*The basis for the **assumed risk** (e.g. the median control group risk across studies) is provided in footnotes. The **corresponding risk** (and its 95% confidence interval) is based on the assumed risk in the comparison group and the **relative effect** of the intervention (and its 95% CI).

**CI:** Confidence interval; **OR:** Odds ratio;

GRADE Working Group grades of evidence

**High quality:** Further research is very unlikely to change our confidence in the estimate of effect.

**Moderate quality:** Further research is likely to have an important impact on our confidence in the estimate of effect and may change the estimate.

**Low quality:** Further research is very likely to have an important impact on our confidence in the estimate of effect and is likely to change the estimate.

**Very low quality:** We are very uncertain about the estimate.

<sup>1</sup> The blinding and distribution concealment methods was no mention in the literature, and there were methodological flaws.

<sup>2</sup> The funnel chart indicated publication bias.

**P.S:** HRT, hormone replacement therapy; YR, Fuke Yangrong Capsule; LWDH, Liuwei Dihuang Pills; XFZY, Xuefu Zhuyu Capsule; PK, Peikun pills; HCDZ, Heche Dazao pills; ZHC, Ziheche Capsule; SW, Siwu Mixture; ZG, Zuogui pills; GS, Guishen pills; ZSYT, Zishen Yutai pills; HS, Huanshao Capsule; KT, Kuntai Capsule.
